# Supplementary material
Source: MDPI journal article supplement (https://www.mdpi.com/2311-5637/9/12/997)
Supplement: s1 [file s1]

**Table S1.** Effect of CaCl<sub>2</sub> and sodium citrate on the fermentation process of gentamicin biosynthesis in *M. echinospora*.

| Time<br>(h) | Fermentation Potency (mg/L)<br>*10 <sup>2</sup> |            | C1 Ratio (100%) |            | C1a Ratio (100%) |            | C2a Ratio (100%) |            | C2 Ratio (100%) |             |
|-------------|-------------------------------------------------|------------|-----------------|------------|------------------|------------|------------------|------------|-----------------|-------------|
|             | CK                                              | CS         | CK              | CS         | CK               | CS         | CK               | CS         | CK              | CS          |
| 0           | 2.50±0.12                                       | 2.70±0.13  | 19.11±0.87      | 15.32±0.76 | 55.00±1.33       | 57.23±0.33 | 9.88±0.38        | 10.23±0.09 | 16.01±0.08      | 17.22±0.52  |
| 12          | 3.90±0.13                                       | 4.20±0.16  | 25.00±0.26      | 20.33±0.42 | 32.03±1.21       | 39.96±0.21 | 13.88±1.99       | 12.98±0.27 | 29.09±1.04      | 26.73±0.48  |
| 24          | 6.30±0.16                                       | 7.00±0.13  | 18.22±1.68      | 17.24±0.95 | 52.12±1.10       | 57.98±0.10 | 11.43±0.2        | 12.4±0.31  | 18.23±0.78      | 12.38±1.16  |
| 36          | 9.10±0.17                                       | 10.10±0.14 | 21.45±1.87      | 17.36±0.69 | 50.98±1.50       | 53.23±0.50 | 11.25±1.43       | 12.54±0.83 | 16.32±1.8       | 16.87±1.02  |
| 48          | 11.50±0.13                                      | 12.90±0.15 | 22.11±0.22      | 18.23±0.31 | 49.13±1.80       | 52.00±0.80 | 11.87±0.85       | 13.21±1.51 | 16.89±0.73      | 16.56±1.02  |
| 60          | 13.90±0.15                                      | 15.20±0.16 | 23.44±1.66      | 19.34±1.22 | 47.22±2.10       | 49.43±0.18 | 12.77±1.18       | 13.45±0.52 | 16.57±0.74      | 17.78±1.56  |
| 72          | 15.80±0.17                                      | 17.58±0.15 | 24.10±0.76      | 21.45±0.56 | 46.11±2.33       | 48.13±0.53 | 13.22±1.69       | 14.12±0.91 | 16.57±0.12      | 16.3±0.94   |
| 84          | 18.20±0.09                                      | 19.00±0.10 | 24.31±0.69      | 20.21±1.11 | 42.96±1.50       | 45.15±0.50 | 13.87±1.74       | 15.3±1.05  | 18.86±0.93      | 19.34±1.66  |
| 96          | 19.60±0.11                                      | 20.90±0.12 | 24.11±0.64      | 23.66±1.07 | 41.32±1.70       | 45.27±0.70 | 14.12±1.66       | 16.33±1.5  | 20.45±0.60      | 14.74±1.87  |
| 108         | 20.70±0.13                                      | 23.10±0.14 | 25.23±0.49      | 26.57±0.09 | 39.40±1.22       | 43.34±0.72 | 14.24±0.77       | 16.57±0.31 | 21.13±0.04      | 13.52±0.324 |
| 120         | 21.50±0.50                                      | 23.98±0.34 | 25.34±1.67      | 25.77±1.17 | 38.33±1.80       | 42.43±0.80 | 15.33±0.83       | 16.96±1.44 | 21±0.70         | 14.84±1.81  |

CK denotes fed batch without calcium chloride and sodium citrate; CS denotes fed batch with calcium chloride and sodium citrate; Three biological replicates were performed, and the data were presented as mean ± SD.

**Table S2.** Differentially expressed proteins potentially related to gentamicin biosynthesis.

| Pathway                 | Uniprot AC | Gene name    | Protein name                                         | Fold changes*     |                | <i>p</i> -value*  |                |
|-------------------------|------------|--------------|------------------------------------------------------|-------------------|----------------|-------------------|----------------|
|                         |            |              |                                                      | CaCl <sub>2</sub> | Sodium Citrate | CaCl <sub>2</sub> | Sodium Citrate |
| Gentamicin biosynthesis | A0A0K0K513 | <i>genD1</i> | Putative gentamicin oxidoreductase/methyltransferase | (-)2.17           | -              | 0.0034            | -              |
|                         | A0A0K0K515 | <i>genB4</i> | Putative gentamicin aminotransferase IV              | ND                | (-)3.66        | ND                | 0.0279         |
|                         | A0A0K0K516 | <i>genD2</i> | Putative gentamicin oxidoreductase                   | ND                | ND             | ND                | ND             |
|                         | A0A0K0K518 | <i>genB3</i> | Putative gentamicin aminotransferase III             | -                 | (-)8.47        | -                 | 0.001          |
|                         | A0A0K0K520 | <i>genX</i>  | Putative gentamicin production protein               | -                 | -              | -                 | -              |
|                         | A0A0K0K522 | <i>genV</i>  | Putative gentamicin exporter                         | -                 | -              | -                 | -              |
|                         | A0A0K0K523 | <i>genS2</i> | Putative gentamicin aminotransferase II              | -                 | (-)5.31        | -                 | 0.0316         |
|                         | A0A0K0K525 | <i>genU</i>  | Putative gentamicin production protein               | -                 | ND             | -                 | ND             |
|                         | A0A0K0K526 | <i>genK</i>  | Putative gentamicin C-methyltransferase              | (-)12.36          | -              | 0.045             | -              |
|                         | A0A0K0K527 | <i>genM2</i> | Putative gentamicin                                  | ND                | ND             | ND                | ND             |

|                                    |            |              |                                                                                |         |         |        |        |
|------------------------------------|------------|--------------|--------------------------------------------------------------------------------|---------|---------|--------|--------|
|                                    |            |              | glycosyltransferase II<br>Gentamicin<br>(Hexosaminyl-6-)<br>aminotransferase I | -       | -       | -      | -      |
|                                    | A0A0K0K528 | <i>genB1</i> |                                                                                |         |         |        |        |
|                                    | A0A0K0K532 | <i>genI</i>  | <b>Putative gentamicin<br/>exporter</b>                                        | (+)4.04 | -       | 0.0007 | -      |
|                                    | A0A0K0K535 | <i>genQ</i>  | Gentamicin<br>hexosaminyl-6'-<br>dehydrogenase                                 | -       | -       | -      | -      |
|                                    | A0A0K0K6A4 | <i>genB2</i> | Putative gentamicin<br>aminotransferase II                                     | (-)3.20 | -       | 0.0427 | -      |
|                                    | A0A0K0K6B9 | <i>genH</i>  | <b>Putative gentamicin<br/>exporter</b>                                        | -       | (+)2.74 | -      | 0.0005 |
| Glycolytic<br>pathway <sup>1</sup> | A0A1C4YCI0 | <i>pfk</i>   | Phosphofructokinase                                                            | (-)4.31 | (-)5.14 | 0.0166 | 0.0024 |
|                                    | A0A1C4YHB7 | <i>pk</i>    | Pyruvate kinase                                                                | -       | (-)4.45 | -      | 0.0014 |
| TCA<br>pathway <sup>1</sup>        | A0A1C5A2F4 | <i>cs</i>    | Citrate synthase                                                               | -       | (-)2.46 | -      | 0.0405 |

\* The fold changes with (+) stand for up-regulated proteins and those with (-) stand for down-regulated proteins. The symbol of “-” stands for non-differentially expressed protein and “ND” stands for non-detected protein.

<sup>1</sup> Only key rate-limiting enzymes in the glycolytic and TCA pathways are shown here. Other differential expressed proteins are shown in Supplementary Figures S2, S3.

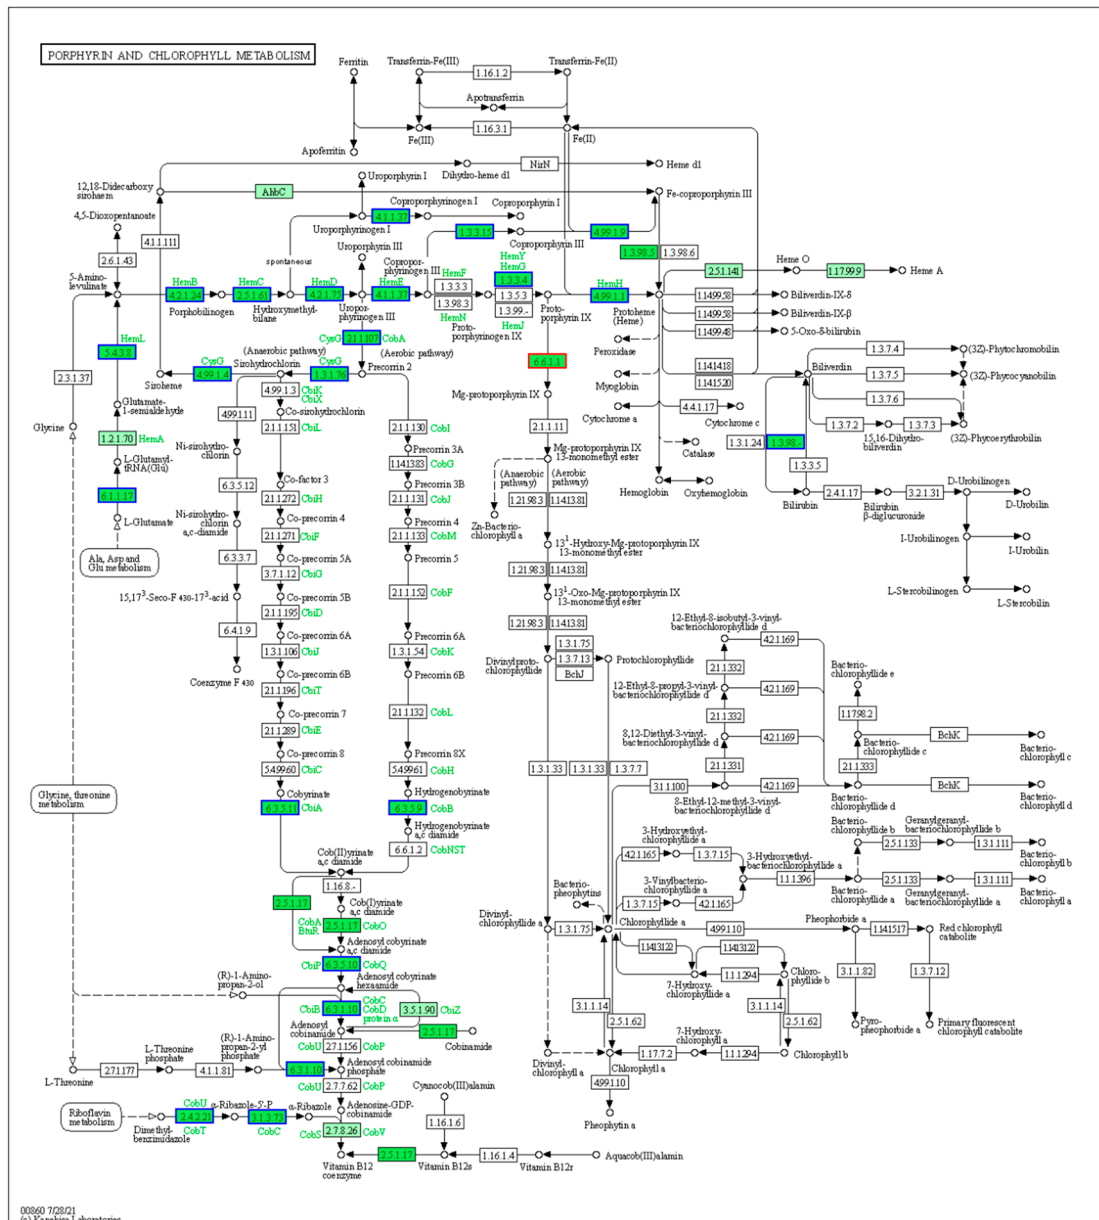

**Figure S1.** The effect of adding  $\text{CaCl}_2$  on vitamin B12 biosynthesis pathway. Green background indicates proteins detected in proteomics, blue boxes indicate proteins that were significantly down-regulated, and red boxes color-code significantly up-regulated proteins.

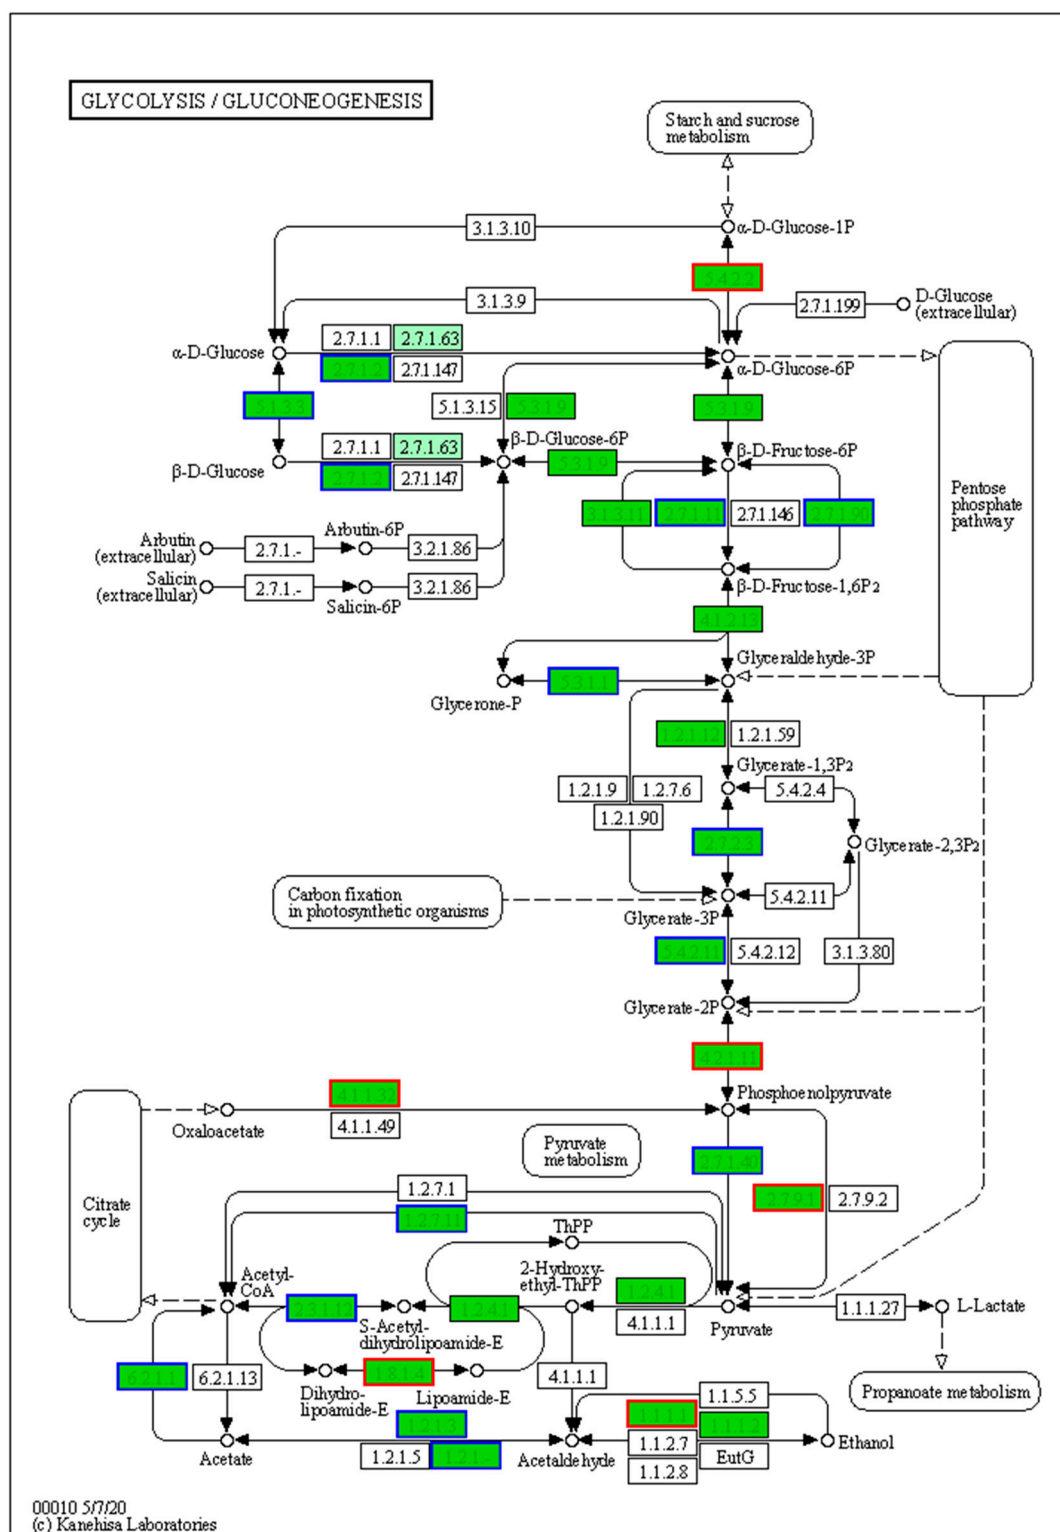

**Figure S2.** The effect of adding sodium citrate on glycolytic pathway. Green background indicates proteins detected in proteomics, blue boxes indicate proteins that were significantly down-regulated, and red boxes color-code significantly up-regulated proteins. Phosphofructokinase EC 2.7.1.11, Pyruvate kinase EC 2.7.1.40.
